# Supplementary material for: Nonlinear relationship between circulating natural killer cell count and 1-year relapse rates in myasthenia gravis: a retrospective cohort study
Source: PeerJ. 2024 Dec 6;12:e18562. doi: 10.7717/peerj.18562 (PMC11627074; doi:10.7717/peerj.18562)
Supplement: Data S1 [file peerj-12-18562-s001.xlsx]

## Sheet: RAWDATA
yes-year recurrence of MG	Gender	age	Thymus	Thymectomy	AChR-ab	MUSK-ab	Osserman classification	Involvement of eye extraocular	Involvement of limb muscles	Involvement of pharyngeal muscles	Involvement of respiratory muscles	Acetylcholinesterase inhibitors	Steroids	Immunosuppressants	Intravenous immunoglobulin	Plasma exchange	CD2no rituximab	NK cell counts.LOG	NK cells proportion.LOG
no	female	27	abnormal	yes	negative	negative	Ⅱ	yes	no	no	no	yes	yes	yes	no	no	no	6.06843	3.09059
no	male	40	normal	no	negative	negative	Ⅱ	yes	no	no	no	yes	yes	no	no	no	no	5.45532	NA
no	female	60	abnormal	yes	positive	negative	Ⅱ	yes	no	no	no	yes	yes	yes	no	no	no	5.16479	2.4681
no	female	24	normal	no	positive	negative	Ⅱ	yes	no	no	no	yes	yes	no	no	no	no	5.47227	3.16842
no	male	69	normal	no	negative	negative	Ⅱ	yes	no	no	no	no	yes	yes	no	no	no	5.12396	2.10291
no	female	33	abnormal	yes	negative	negative	Ⅲ	no	yes	no	no	yes	yes	no	no	no	no	4.07754	2.80336
no	male	19	abnormal	no	negative	negative	Ⅱ	yes	no	no	no	yes	no	no	no	no	no	5.743	2.81121
no	female	52	abnormal	yes	negative	negative	Ⅲ	yes	no	yes	no	yes	yes	no	no	no	no	5.98645	2.82731
no	male	31	normal	no	negative	negative	Ⅱ	yes	no	no	no	no	yes	no	no	no	no	5.67675	2.93386
no	female	24	abnormal	yes	positive	negative	Ⅲ	yes	yes	yes	no	yes	yes	no	no	no	no	5.49306	2.64333
no	female	29	abnormal	no	negative	negative	Ⅱ	yes	no	no	no	yes	yes	no	no	no	no	4.7362	2.00821
no	male	44	abnormal	yes	negative	negative	Ⅳ	yes	yes	no	yes	yes	no	no	no	no	no	4.86753	2.61007
no	female	36	normal	yes	negative	negative	Ⅲ	yes	yes	no	no	no	yes	yes	no	no	no	6.69703	1.96431
no	female	57	abnormal	no	positive	negative	Ⅲ	no	no	yes	no	yes	yes	no	no	no	no	6.41346	3.50225
no	female	21	abnormal	yes	negative	negative	Ⅱ	yes	no	no	no	yes	no	no	no	no	yes	6.56386	1.99742
no	female	72	normal	no	negative	negative	Ⅲ	yes	yes	no	no	yes	yes	no	no	no	no	5.24175	2.27006
no	male	67	abnormal	yes	positive	negative	Ⅱ	yes	no	no	no	yes	yes	no	no	no	no	4.21951	3.73074
no	female	27	normal	no	negative	negative	Ⅲ	yes	yes	no	no	yes	yes	no	no	no	no	6.74052	3.74997
no	male	23	abnormal	no	negative	negative	Ⅲ	yes	no	yes	no	yes	yes	no	yes	no	no	5.68358	2.69598
no	male	63	abnormal	no	negative	negative	Ⅲ	yes	yes	yes	no	yes	yes	no	yes	no	no	5.38907	2.48823
no	male	64	normal	no	positive	negative	Ⅱ	yes	no	no	no	yes	yes	no	no	no	no	5.6058	3.18677
no	female	63	normal	no	positive	negative	Ⅳ	yes	no	yes	yes	yes	yes	no	no	no	no	6.2634	3.28803
no	male	80	normal	no	positive	negative	Ⅲ	yes	yes	no	no	yes	no	yes	no	no	no	6.02102	3.49165
no	female	44	normal	no	negative	negative	Ⅲ	yes	yes	no	no	yes	no	no	no	no	no	6.03309	2.9418
no	female	47	normal	no	positive	negative	Ⅲ	yes	yes	no	no	yes	yes	no	no	no	no	5.45959	2.37584
no	female	33	abnormal	yes	positive	negative	Ⅲ	yes	no	yes	no	yes	no	no	no	no	no	4.62497	1.98924
no	male	56	normal	no	negative	negative	Ⅲ	yes	no	yes	no	yes	yes	no	no	no	no	6.15273	3.17972
no	female	23	normal	no	positive	negative	Ⅱ	yes	no	no	no	yes	yes	no	no	no	yes	6.35957	3.51304
no	female	16	abnormal	no	negative	negative	Ⅱ	yes	no	no	no	no	yes	no	no	no	no	4.80402	1.89612
no	female	31	normal	no	negative	negative	Ⅱ	yes	no	no	no	yes	yes	no	no	no	no	5.33272	2.42922
no	female	70	normal	no	positive	negative	Ⅲ	no	yes	no	no	yes	no	no	no	no	no	5.4161	2.86903
no	female	61	normal	no	negative	negative	Ⅲ	yes	yes	no	no	yes	yes	no	no	no	no	6.75926	3.48921
no	female	62	normal	no	negative	negative	Ⅱ	yes	no	no	no	yes	no	no	no	no	no	5.71703	2.71602
no	female	23	abnormal	no	positive	negative	Ⅲ	yes	yes	yes	no	no	yes	yes	no	no	no	5.67675	3.16884
no	female	24	normal	no	positive	negative	Ⅱ	yes	no	no	no	yes	yes	no	no	no	no	5.0814	0.982078
no	male	35	abnormal	no	negative	negative	Ⅲ	yes	yes	no	no	yes	yes	no	no	no	no	5.14749	3.09964
no	female	71	normal	no	negative	negative	Ⅱ	yes	no	no	no	yes	yes	no	no	no	no	5.20949	2.23645
no	male	78	normal	no	negative	negative	Ⅱ	yes	no	no	no	yes	no	no	no	no	no	5.90536	3.0713
no	male	30	normal	no	negative	negative	Ⅲ	yes	yes	no	no	yes	no	no	no	no	no	5.35186	2.15987
no	female	56	normal	no	positive	negative	Ⅳ	yes	no	yes	yes	yes	yes	yes	yes	no	no	5.07517	2.40243
no	male	84	normal	no	positive	negative	Ⅲ	yes	yes	no	no	yes	yes	no	no	no	no	5.64897	3.19745
no	female	85	normal	yes	positive	negative	Ⅲ	yes	yes	yes	no	yes	yes	yes	yes	no	no	5.60212	1.60944
no	female	49	normal	yes	positive	negative	Ⅱ	yes	no	no	no	yes	yes	yes	no	no	no	6.69703	3.63759
no	female	52	normal	no	negative	negative	Ⅲ	yes	yes	no	no	yes	yes	no	yes	no	no	5.8861	2.57185
no	female	67	abnormal	no	positive	negative	Ⅲ	yes	yes	no	no	yes	yes	yes	no	no	no	6.35784	3.18221
no	female	23	abnormal	no	positive	negative	Ⅱ	yes	no	no	no	yes	no	no	no	no	yes	5.69036	3.05259
no	female	47	normal	no	negative	negative	Ⅱ	yes	no	no	no	no	no	no	no	no	no	4.7185	1.78842
no	female	44	normal	no	negative	negative	Ⅲ	yes	no	no	no	yes	yes	no	no	no	no	6.75693	3.74384
no	male	74	normal	no	positive	negative	Ⅲ	yes	no	no	no	yes	yes	no	no	no	no	6.29711	3.53398
no	female	27	normal	no	negative	negative	Ⅲ	yes	yes	no	no	yes	yes	no	no	no	no	4.8828	1.9615
no	female	59	normal	no	negative	negative	Ⅲ	yes	yes	no	no	yes	yes	no	yes	no	no	5.15906	2.36744
no	female	58	normal	no	negative	negative	Ⅲ	yes	yes	no	no	yes	yes	no	no	no	no	5.24175	3.00914
no	female	16	normal	no	positive	negative	Ⅲ	no	yes	yes	no	yes	yes	yes	no	no	no	5.45104	2.22462
no	female	51	abnormal	yes	positive	negative	Ⅳ	yes	yes	no	yes	yes	yes	yes	no	no	no	4.06044	1.50185
no	male	22	normal	no	positive	negative	Ⅱ	yes	no	no	no	yes	yes	no	no	no	yes	5.90808	2.18717
no	female	33	normal	no	negative	negative	Ⅱ	yes	no	no	no	yes	no	no	no	no	no	5.57973	2.65605
no	female	79	normal	no	negative	negative	Ⅱ	yes	no	no	no	yes	yes	no	no	no	no	5.44242	2.71138
no	female	47	normal	no	negative	negative	Ⅲ	no	no	yes	no	yes	yes	no	no	no	no	4.79579	2.33699
no	male	3	normal	no	negative	negative	Ⅱ	yes	no	no	no	yes	yes	no	no	no	no	5.63835	2.42037
no	male	56	normal	no	positive	negative	Ⅱ	yes	no	no	no	yes	no	no	no	no	no	5.23111	2.17702
no	female	64	normal	no	negative	negative	Ⅲ	no	yes	yes	no	yes	no	no	no	no	no	5.57215	3.13157
no	male	21	normal	no	positive	negative	Ⅲ	yes	yes	no	yes	yes	yes	no	no	no	no	5.04986	2.44235
no	female	20	normal	no	positive	negative	Ⅱ	yes	no	no	no	yes	yes	no	no	no	yes	4.56435	1.80336
no	female	51	abnormal	yes	positive	negative	Ⅲ	yes	yes	yes	no	yes	yes	no	no	no	no	4.97673	2.36085
no	female	52	abnormal	no	positive	negative	Ⅲ	yes	yes	yes	yes	yes	yes	no	yes	no	no	5.29832	3.18013
no	female	57	abnormal	yes	negative	negative	Ⅱ	yes	no	no	no	yes	yes	no	no	no	no	5.16479	2.49815
no	female	49	normal	no	positive	negative	Ⅲ	yes	yes	no	no	yes	yes	no	no	no	no	4.76217	2.4613
no	male	56	normal	no	negative	negative	Ⅱ	yes	no	no	no	yes	yes	no	no	no	no	4.77068	1.90061
no	female	63	normal	no	negative	negative	Ⅳ	no	no	yes	yes	yes	yes	no	no	no	no	4.04305	1.26695
no	male	59	normal	no	positive	negative	Ⅱ	yes	no	no	no	yes	no	no	no	no	no	6.41999	3.42849
no	female	63	normal	no	positive	negative	Ⅱ	yes	no	no	no	yes	no	no	no	no	no	5.21494	2.50553
no	male	65	normal	no	positive	negative	Ⅱ	yes	no	no	no	no	no	no	no	no	no	5.43808	2.57946
no	male	36	normal	no	positive	negative	Ⅲ	yes	yes	yes	no	yes	yes	no	no	no	no	5.3033	2.70404
no	male	79	normal	no	positive	negative	Ⅱ	yes	no	no	no	yes	yes	no	no	no	no	5.76832	3.76723
no	female	81	abnormal	no	positive	negative	Ⅲ	yes	yes	no	no	yes	no	no	no	no	no	4.7185	2.06179
no	female	57	normal	no	negative	negative	Ⅱ	yes	no	no	no	yes	yes	no	yes	no	no	6.74759	3.612
no	female	70	abnormal	yes	positive	negative	Ⅲ	yes	yes	no	yes	yes	yes	yes	yes	no	no	4.77912	2.29051
no	male	33	normal	no	positive	negative	Ⅱ	yes	no	no	no	yes	yes	no	no	no	no	5.23644	2.25024
no	female	85	normal	no	negative	negative	Ⅲ	yes	yes	no	no	no	no	no	yes	no	no	5.98645	3.27299
no	female	52	normal	no	negative	negative	Ⅱ	yes	no	no	no	yes	yes	no	no	no	no	4.56435	2.36931
no	male	25	normal	no	positive	negative	Ⅱ	yes	no	no	no	yes	yes	no	no	no	yes	6.58064	3.16927
no	female	68	normal	no	positive	negative	Ⅳ	yes	yes	no	yes	yes	no	yes	no	no	no	5.63121	2.67415
no	female	58	normal	no	positive	negative	Ⅲ	yes	yes	no	no	yes	yes	yes	no	no	no	6.15486	3.45411
no	female	18	abnormal	no	negative	negative	Ⅲ	yes	yes	no	no	yes	no	no	no	no	no	5.39363	2.44755
no	female	39	abnormal	no	positive	negative	Ⅲ	yes	yes	no	no	yes	yes	no	no	no	no	5.45959	2.43624
no	female	NA	normal	no	negative	negative	Ⅲ	no	no	yes	no	no	no	no	no	no	no	5.01728	2.23538
no	male	39	normal	no	positive	negative	Ⅱ	yes	no	no	no	yes	no	no	no	no	no	5.20401	2.03078
no	male	68	normal	no	positive	negative	Ⅱ	yes	no	no	no	yes	no	no	no	no	no	4.47734	2.32435
no	female	52	abnormal	no	positive	negative	Ⅲ	yes	yes	yes	no	yes	yes	no	yes	no	no	5.3845	2.67277
no	female	58	normal	no	positive	negative	Ⅲ	yes	yes	yes	no	yes	yes	no	no	no	yes	6.44889	2.50471
no	female	31	abnormal	no	negative	negative	Ⅱ	yes	no	no	no	yes	no	no	no	no	no	4.81218	2.06306
no	male	13	normal	no	negative	negative	Ⅲ	no	yes	no	no	no	yes	no	no	no	no	5.0814	2.25968
no	female	47	abnormal	yes	negative	negative	Ⅳ	yes	no	no	yes	no	yes	no	no	no	no	5.59099	3.35864
no	female	66	normal	no	negative	negative	Ⅲ	no	yes	yes	no	yes	yes	no	no	no	no	4.60517	2.67622
no	female	49	abnormal	no	negative	negative	Ⅲ	yes	no	yes	no	yes	yes	no	yes	no	yes	4.96284	2.40062
no	male	NA	abnormal	NA	positive	negative	Ⅱ	yes	no	no	no	no	no	no	no	no	no	6.24222	2.82613
no	female	38	abnormal	yes	negative	negative	Ⅲ	no	no	yes	no	yes	yes	no	yes	no	no	5.33754	2.65535
no	female	29	normal	no	negative	negative	Ⅱ	yes	no	no	no	yes	yes	no	no	no	no	6.8977	3.40086
no	female	46	abnormal	NA	positive	negative	Ⅱ	yes	no	no	no	no	no	no	no	no	no	6.1334	3.52046
no	female	53	normal	no	negative	negative	Ⅲ	yes	yes	no	no	yes	yes	no	yes	no	no	5.54908	2.61301
no	male	15	normal	no	negative	negative	Ⅱ	yes	no	no	no	yes	yes	no	no	no	yes	5.40268	1.98787
no	female	65	normal	no	positive	negative	Ⅱ	yes	no	no	no	yes	yes	no	no	no	no	6.40026	3.90902
no	female	64	normal	no	positive	negative	Ⅱ	yes	no	no	no	yes	yes	no	no	no	no	5.54518	3.16632
no	female	54	abnormal	no	negative	negative	Ⅱ	yes	no	no	no	no	yes	no	no	no	no	4.75359	1.94018
no	female	19	normal	no	positive	negative	Ⅱ	yes	no	no	no	yes	yes	no	no	no	no	4.8828	1.95445
no	female	31	abnormal	yes	negative	negative	Ⅲ	yes	no	yes	no	no	no	no	no	no	no	5.34233	1.8516
no	male	60	abnormal	yes	positive	negative	Ⅱ	yes	no	no	no	no	no	no	no	no	yes	5.8693	3.60794
no	female	20	normal	no	positive	negative	Ⅱ	yes	no	no	no	no	no	no	no	no	no	5.76832	2.32825
no	female	40	normal	no	negative	negative	Ⅱ	yes	no	no	no	no	no	no	no	no	no	5.22575	3.17011
no	female	20	normal	no	positive	negative	Ⅱ	yes	no	no	no	no	no	no	no	no	no	5.01064	2.50879
no	male	68	abnormal	no	positive	negative	Ⅱ	yes	no	no	no	no	yes	no	no	no	yes	4.47734	2.32435
no	male	32	normal	no	positive	negative	Ⅲ	yes	yes	no	no	no	no	no	no	no	no	5.8861	0.576613
no	female	16	normal	no	positive	negative	Ⅱ	yes	no	no	no	yes	yes	yes	yes	no	yes	6.49677	3.48401
yes	female	57	normal	no	positive	negative	Ⅲ	no	no	yes	no	yes	no	yes	yes	no	no	6.02828	3.35968
no	female	59	normal	no	positive	negative	Ⅲ	no	no	yes	no	yes	yes	yes	no	no	no	6.02828	3.1913
yes	female	61	normal	no	positive	negative	Ⅲ	no	no	yes	no	yes	yes	yes	yes	no	no	6.47851	3.28616
no	female	61	normal	no	positive	negative	Ⅲ	no	no	yes	no	yes	yes	yes	yes	no	no	5.97381	3.30064
no	male	15	abnormal	no	negative	negative	Ⅱ	yes	no	yes	no	yes	yes	yes	no	no	no	5.98394	2.88592
yes	female	44	abnormal	yes	negative	negative	Ⅱ	yes	no	yes	no	yes	yes	no	no	no	no	6.58755	1.27536
yes	female	46	abnormal	yes	negative	negative	Ⅱ	yes	no	yes	no	yes	yes	yes	no	no	no	6.04501	0.322083
no	male	74	normal	no	positive	negative	Ⅱ	yes	no	no	no	yes	yes	yes	no	no	no	5.88888	3.8111
no	female	73	normal	no	negative	negative	Ⅱ	yes	no	no	no	yes	yes	no	no	no	no	4.51086	2.42214
yes	female	73	normal	no	negative	negative	Ⅱ	yes	no	no	no	yes	yes	yes	yes	no	no	4.64439	2.58776
yes	female	76	normal	no	negative	negative	Ⅱ	yes	no	no	no	yes	no	no	yes	no	no	5.8693	3.43689
no	male	71	normal	no	positive	negative	Ⅲ	yes	yes	no	no	no	no	no	no	no	no	7.56424	3.97931
no	female	42	normal	no	negative	negative	Ⅱ	yes	no	no	no	yes	yes	no	no	no	no	5.90536	2.70605
yes	male	69	normal	no	negative	positive	Ⅳ	no	yes	yes	yes	yes	yes	no	no	no	no	5.1985	2.83145
no	female	51	normal	no	positive	negative	Ⅲ	yes	yes	no	no	yes	yes	no	no	no	no	6.1591	2.63977
no	female	54	normal	no	negative	negative	Ⅲ	yes	yes	no	no	yes	yes	no	no	no	no	4.2485	1.37624
no	female	42	normal	no	negative	negative	Ⅱ	yes	no	no	no	yes	no	yes	no	no	no	5.80814	2.92692
no	female	35	abnormal	yes	positive	negative	Ⅲ	no	no	no	yes	yes	yes	no	yes	no	no	5.67332	2.24177
yes	male	51	abnormal	no	negative	negative	Ⅳ	yes	yes	no	yes	yes	yes	no	yes	no	no	6.06843	2.38876
yes	female	49	normal	no	positive	negative	Ⅲ	yes	yes	no	no	yes	yes	no	no	no	no	3.82864	2.94969
no	female	48	abnormal	no	positive	negative	Ⅲ	yes	yes	yes	no	yes	yes	no	no	no	no	5.43808	2.82435
yes	female	50	abnormal	no	positive	negative	Ⅲ	yes	yes	yes	no	yes	yes	no	yes	no	no	3.71357	1.85003
no	female	44	normal	no	negative	negative	Ⅱ	yes	no	no	no	yes	yes	no	no	no	no	5.00395	2.82968
no	male	19	normal	no	positive	negative	Ⅲ	yes	no	no	no	yes	yes	no	no	no	no	5.89164	3.28766
yes	male	20	normal	no	negative	negative	Ⅲ	yes	no	no	no	yes	yes	yes	no	no	no	5.75574	3.21888
yes	male	60	abnormal	no	negative	negative	Ⅲ	yes	yes	yes	no	no	yes	no	no	no	no	6.02102	2.86448
no	female	71	abnormal	yes	negative	negative	Ⅲ	yes	yes	no	no	yes	yes	yes	no	no	no	6.64379	3.27978
yes	female	72	abnormal	yes	negative	negative	Ⅲ	yes	yes	no	no	yes	no	yes	yes	no	no	2.99573	1.1314
yes	female	45	abnormal	yes	positive	positive	Ⅲ	yes	yes	yes	no	yes	yes	no	no	no	no	7.03703	3.7077
no	male	65	abnormal	yes	positive	negative	Ⅱ	yes	no	no	no	yes	no	no	no	no	yes	5.55683	2.22246
no	female	37	abnormal	yes	negative	negative	Ⅲ	yes	yes	no	no	yes	yes	no	yes	no	no	4.81218	1.29473
yes	female	19	abnormal	no	negative	negative	Ⅳ	yes	no	no	yes	yes	yes	no	no	no	no	5.54518	2.81421
yes	female	49	abnormal	no	positive	negative	Ⅱ	yes	no	no	no	yes	yes	no	no	no	no	5.83773	2.53687
no	female	66	normal	no	negative	negative	Ⅲ	yes	no	yes	no	yes	yes	yes	no	no	no	5.62762	2.86733
yes	female	68	normal	no	negative	negative	Ⅲ	yes	yes	no	no	no	yes	no	no	no	no	6.02587	2.92424
no	male	23	abnormal	no	positive	negative	Ⅱ	yes	no	no	no	yes	yes	no	no	no	no	6.31716	2.81121
yes	female	14	normal	no	positive	negative	Ⅱ	yes	no	no	no	yes	yes	no	no	no	no	5.40717	2.19054
yes	female	16	normal	no	positive	negative	Ⅱ	yes	no	no	no	yes	no	no	no	no	yes	3.98898	1.28093
yes	male	17	abnormal	no	negative	negative	Ⅲ	yes	yes	no	no	yes	yes	no	no	no	no	6.23832	2.97195
no	female	50	normal	no	positive	negative	Ⅲ	yes	yes	yes	no	yes	yes	no	no	no	no	5.11199	3.21727
yes	female	78	abnormal	yes	negative	negative	Ⅲ	yes	yes	no	no	yes	no	no	yes	no	no	5.07517	2.6174
no	female	80	abnormal	yes	negative	negative	Ⅲ	yes	yes	yes	no	yes	no	no	yes	no	no	5.19296	3.28989
yes	female	22	normal	yes	positive	negative	Ⅲ	yes	yes	no	no	yes	yes	no	yes	no	no	4.55388	1.31909
yes	male	24	abnormal	yes	positive	negative	Ⅱ	yes	no	no	no	yes	yes	no	no	no	no	7.31721	3.81043
yes	female	42	abnormal	no	positive	negative	Ⅱ	yes	no	no	no	yes	yes	no	no	no	no	4.83628	2.59227
yes	female	44	abnormal	no	positive	negative	Ⅱ	yes	no	no	no	yes	yes	yes	no	no	no	5.29832	2.93173
no	female	45	abnormal	no	positive	negative	Ⅱ	yes	no	no	no	yes	yes	yes	no	no	no	5.92426	3.35096
no	female	46	abnormal	no	positive	negative	Ⅱ	yes	no	no	no	yes	yes	yes	yes	no	no	5.26786	2.75621
yes	female	65	normal	no	negative	negative	Ⅳ	yes	yes	yes	no	yes	yes	no	no	no	no	4.63473	2.9872
yes	female	37	abnormal	yes	positive	negative	Ⅲ	yes	no	yes	no	yes	yes	no	no	no	no	5.03044	2.39608
no	female	31	abnormal	yes	negative	negative	Ⅳ	yes	yes	yes	yes	yes	yes	no	yes	no	no	5.37064	2.50144
no	female	21	normal	no	positive	negative	Ⅲ	yes	yes	no	no	yes	yes	no	no	no	yes	5.23644	1.42552
no	female	54	abnormal	yes	positive	negative	Ⅱ	yes	no	no	no	yes	no	no	no	no	yes	4.69135	1.83418
yes	female	48	abnormal	yes	negative	negative	Ⅳ	yes	yes	yes	no	yes	yes	yes	yes	no	no	5.15906	1.7613
yes	male	50	normal	no	negative	positive	Ⅲ	yes	yes	yes	no	yes	yes	yes	no	no	no	6.04737	3.03206
no	male	53	abnormal	NA	negative	negative	Ⅳ	yes	yes	no	yes	yes	yes	no	yes	no	no	5.36598	2.64404
yes	female	31	abnormal	yes	positive	negative	Ⅲ	yes	yes	no	no	yes	yes	no	no	no	no	5.97889	3.18055
no	male	23	abnormal	no	positive	negative	Ⅲ	yes	yes	yes	no	yes	yes	no	yes	no	no	4.62497	1.805
yes	male	59	abnormal	no	positive	negative	Ⅱ	yes	no	no	no	yes	yes	no	no	no	no	5.26269	2.3466
yes	female	29	normal	no	positive	negative	Ⅲ	yes	no	yes	no	yes	no	yes	yes	no	no	4.74493	2.07944
no	female	70	normal	no	negative	negative	Ⅲ	no	yes	no	no	yes	yes	no	yes	no	no	4.2485	2.10413
yes	female	15	normal	no	positive	negative	Ⅱ	yes	no	no	no	yes	yes	no	no	no	no	5.55683	2.78932
yes	female	17	normal	no	positive	negative	Ⅱ	yes	no	no	no	yes	no	no	yes	no	yes	4.39445	2.23965
no	female	71	normal	no	positive	negative	Ⅳ	yes	no	yes	yes	yes	yes	no	yes	no	no	4.39445	2.46979
no	female	31	abnormal	no	negative	negative	Ⅱ	yes	no	no	no	yes	yes	no	no	no	no	6.01127	1.8563
yes	male	22	normal	no	positive	negative	Ⅱ	yes	no	no	no	yes	yes	no	yes	no	no	5.0814	2.98214
yes	male	26	normal	no	positive	negative	Ⅱ	yes	no	no	no	yes	yes	no	no	no	yes	4.7185	3.34955
no	female	27	normal	no	positive	negative	Ⅱ	yes	no	no	no	yes	yes	no	no	no	no	4.15888	1.30291
no	female	58	abnormal	no	positive	negative	Ⅱ	yes	no	no	no	yes	yes	yes	no	no	no	5.35186	2.58475
no	female	23	abnormal	no	positive	negative	Ⅱ	yes	no	no	no	yes	no	no	no	no	no	5.0689	2.44235
yes	female	53	normal	no	positive	negative	Ⅲ	yes	yes	no	no	yes	yes	no	no	no	no	3.98898	2.52813
yes	male	55	normal	no	negative	negative	Ⅲ	yes	yes	no	no	yes	yes	no	yes	yes	no	5.0814	1.8453
no	female	27	abnormal	no	negative	negative	Ⅱ	yes	no	no	no	yes	yes	yes	no	no	no	4.99043	2.1471
yes	male	22	abnormal	no	positive	negative	Ⅱ	yes	no	no	no	yes	yes	no	yes	no	no	5.71703	2.95282
yes	female	19	abnormal	no	positive	negative	Ⅳ	yes	yes	yes	no	yes	yes	yes	no	yes	no	4.59512	1.67896
no	female	48	normal	yes	negative	negative	Ⅲ	yes	no	yes	no	yes	yes	yes	no	no	no	6.44095	3.30138
yes	male	56	normal	yes	positive	negative	Ⅲ	yes	no	yes	no	yes	yes	no	no	no	no	5.87212	3.44776
yes	male	60	normal	yes	positive	negative	Ⅲ	yes	no	yes	no	no	yes	no	no	no	no	3.71357	3.37348
no	male	28	abnormal	no	negative	negative	Ⅳ	yes	no	yes	no	yes	yes	no	yes	no	no	4.91998	2.38968
yes	male	53	normal	no	negative	negative	Ⅲ	yes	yes	no	no	yes	NA	yes	yes	no	no	4.91998	2.59077
no	female	65	normal	yes	positive	negative	Ⅱ	yes	no	no	no	yes	yes	yes	no	no	no	6.86171	3.07084
no	female	64	normal	no	positive	negative	Ⅲ	yes	no	yes	no	yes	yes	yes	no	no	no	5.44674	3.0214
yes	female	75	normal	no	positive	negative	Ⅱ	yes	no	no	no	yes	no	yes	no	no	no	3.7612	3.15145
yes	female	78	normal	no	positive	negative	Ⅲ	yes	no	yes	no	yes	yes	no	no	no	no	5.97635	3.14027
yes	female	30	normal	no	positive	negative	Ⅲ	yes	yes	yes	no	yes	yes	no	no	no	no	4.57471	1.88099
yes	male	51	abnormal	no	positive	negative	Ⅳ	yes	no	yes	yes	yes	yes	no	yes	no	no	4.91265	2.5611
yes	female	16	normal	no	positive	negative	Ⅱ	yes	no	no	no	yes	yes	no	no	no	no	4.07754	1.31103
no	female	48	normal	yes	negative	negative	Ⅳ	no	yes	no	yes	yes	yes	yes	yes	no	yes	5.15906	1.7613
yes	male	22	normal	no	positive	negative	Ⅱ	yes	no	no	no	no	yes	no	no	no	yes	6.1334	2.98214
no	male	26	normal	no	positive	negative	Ⅱ	yes	no	no	no	no	yes	no	no	no	yes	4.36945	3.34955
yes	female	55	normal	yes	positive	negative	Ⅱ	yes	no	no	no	yes	yes	no	no	yes	no	5.2933	2.31353
no	female	56	abnormal	no	positive	negative	Ⅲ	yes	no	yes	no	yes	yes	no	yes	no	no	5.49306	3.85841
no	female	13	abnormal	no	positive	negative	Ⅱ	yes	no	no	no	yes	yes	no	no	no	no	5.8944	3.24571
yes	female	16	abnormal	no	positive	negative	Ⅳ	yes	no	no	no	yes	yes	yes	no	no	no	5.94542	3.01013
yes	female	32	abnormal	yes	negative	negative	Ⅱ	yes	no	no	no	no	yes	no	no	no	no	5.81114	3.32179
yes	female	20	normal	no	positive	negative	Ⅳ	yes	yes	no	yes	no	yes	yes	no	no	no	5.0876	2.5337
no	female	25	abnormal	no	negative	negative	Ⅱ	yes	no	no	no	no	yes	no	no	no	no	4.85203	1.90061
no	male	56	normal	no	positive	negative	Ⅳ	NA	no	no	no	no	yes	no	no	no	no	5.34711	2.28849
yes	female	21	abnormal	yes	negative	negative	Ⅲ	yes	yes	no	no	no	yes	no	no	no	no	5.18739	2.52573
no	male	34	normal	no	negative	negative	Ⅱ	yes	no	no	no	no	yes	no	no	no	no	5.83481	NA
yes	female	31	abnormal	no	positive	negative	Ⅲ	yes	no	yes	no	no	yes	no	no	no	no	3.93183	0.756122
no	female	38	abnormal	yes	negative	negative	Ⅲ	yes	no	yes	no	no	yes	no	no	no	no	5.35659	2.43624
yes	male	48	normal	no	positive	negative	Ⅳ	yes	no	yes	yes	no	yes	yes	no	no	no	5.15329	2.31747
yes	male	24	normal	no	positive	negative	Ⅲ	yes	yes	no	no	no	yes	no	no	no	no	5.87493	2.37862
no	female	43	normal	no	negative	negative	Ⅲ	yes	no	yes	no	no	no	no	no	no	no	5.24175	2.28238
yes	male	30	abnormal	no	positive	negative	Ⅲ	no	yes	no	no	no	yes	no	no	no	no	4.99043	2.17589
yes	female	44	abnormal	no	positive	negative	Ⅲ	yes	no	yes	no	no	yes	no	no	no	yes	3.09104	0.173953
no	female	75	abnormal	no	negative	negative	Ⅳ	yes	no	yes	yes	no	yes	no	no	no	no	3.97029	2.20387
no	female	35	normal	yes	positive	negative	Ⅱ	yes	no	no	no	no	yes	no	no	no	no	5.62762	2.75302
yes	female	58	normal	NA	positive	negative	Ⅲ	no	yes	no	no	no	yes	no	no	no	no	4.99721	2.29556
no	male	63	normal	no	positive	negative	Ⅱ	yes	no	no	no	no	no	no	no	no	no	5.15329	2.38509
no	male	57	normal	no	positive	negative	Ⅱ	yes	no	no	no	no	yes	no	no	no	no	4.85981	2.24601
yes	male	54	abnormal	yes	positive	negative	Ⅱ	yes	no	no	no	no	yes	no	no	no	no	5.2933	2.70337
no	male	40	abnormal	yes	positive	negative	Ⅲ	yes	yes	yes	no	no	yes	no	no	no	no	4.49981	1.36864
yes	male	41	abnormal	no	positive	negative	Ⅳ	yes	yes	yes	no	no	yes	no	no	no	no	4.85981	1.98924
no	male	55	abnormal	yes	positive	negative	Ⅲ	yes	yes	yes	no	no	no	yes	no	no	no	4.8828	2.23431
no	male	54	abnormal	yes	positive	negative	Ⅱ	yes	no	no	no	no	yes	no	no	no	no	5.52545	2.72327
yes	male	65	normal	no	positive	negative	Ⅱ	yes	no	no	no	no	yes	yes	no	no	no	3.82864	2.25968
yes	male	52	abnormal	no	positive	negative	Ⅱ	yes	no	no	no	no	no	no	no	no	no	5.22575	1.92716
no	female	65	normal	no	positive	negative	Ⅱ	yes	no	no	no	yes	no	no	no	no	no	5.53733	3.47754
yes	female	35	abnormal	no	negative	negative	Ⅱ	yes	no	no	no	no	yes	no	no	no	no	4.60517	1.56025
no	male	44	abnormal	yes	positive	negative	Ⅱ	yes	no	no	no	no	yes	no	no	no	no	5.26786	2.46044
yes	female	22	abnormal	no	negative	negative	Ⅲ	no	yes	no	no	no	no	no	no	no	no	5.05625	2.06433
yes	male	29	normal	no	negative	negative	Ⅳ	yes	yes	yes	yes	no	yes	yes	no	no	no	3.7612	1.40364
no	female	48	normal	no	positive	negative	Ⅲ	yes	yes	yes	no	no	yes	yes	no	no	no	5.17615	2.46044
yes	male	51	NA	yes	positive	negative	Ⅱ	yes	no	no	no	no	yes	no	no	no	no	5.26269	2.14593
no	female	43	abnormal	no	positive	negative	Ⅱ	yes	yes	yes	no	no	yes	yes	no	no	no	5.66296	2.91669
yes	male	51	normal	no	positive	negative	Ⅲ	yes	yes	yes	no	no	yes	no	no	no	no	4.97673	1.55814
yes	female	39	abnormal	no	positive	negative	Ⅳ	yes	yes	yes	yes	no	yes	no	no	no	no	4.12713	1.37624
yes	female	51	abnormal	no	negative	negative	Ⅱ	no	no	no	yes	no	yes	no	no	no	no	5.63479	3.56869
yes	female	26	abnormal	no	positive	negative	Ⅱ	yes	no	no	no	no	yes	no	no	no	no	3.93183	3.07223
no	male	68	abnormal	no	positive	negative	Ⅱ	yes	no	no	no	no	yes	no	no	no	no	5.53733	3.23789
yes	male	45	abnormal	yes	positive	negative	Ⅲ	yes	yes	yes	no	no	yes	no	no	no	no	4.8752	3.52577
yes	male	61	abnormal	no	positive	negative	Ⅳ	yes	yes	yes	yes	no	yes	yes	no	no	no	4.11087	2.26903
no	male	32	abnormal	no	positive	negative	Ⅲ	no	yes	no	no	no	yes	no	no	no	no	5.5835	0.576613
yes	male	52	abnormal	no	positive	negative	Ⅱ	yes	no	no	no	no	yes	no	no	no	no	5.18739	2.0189
yes	female	21	normal	no	positive	negative	Ⅲ	yes	yes	yes	no	no	yes	no	no	no	no	4.23411	2.09924
yes	female	71	normal	no	positive	negative	Ⅳ	yes	yes	yes	yes	no	yes	no	no	no	no	4.54329	2.40153
yes	female	40	abnormal	yes	positive	negative	Ⅲ	yes	yes	yes	no	yes	yes	yes	no	no	no	4.72739	2.16102
no	female	NA	normal	no	negative	negative	Ⅱ	yes	no	no	no	no	yes	no	no	no	no	5.68358	2.89591
yes	female	29	abnormal	yes	positive	negative	Ⅲ	yes	yes	yes	no	no	yes	yes	no	no	no	5.44242	2.53687
yes	male	40	normal	no	positive	negative	Ⅲ	no	yes	no	no	no	yes	no	no	no	no	4.94876	2.28544
yes	male	37	abnormal	yes	positive	negative	Ⅲ	yes	yes	yes	no	no	yes	yes	no	no	no	4.52179	1.23256
no	female	29	abnormal	no	positive	negative	Ⅳ	yes	yes	no	yes	no	yes	yes	no	no	no	6.2672	2.73502
yes	female	27	normal	no	positive	negative	Ⅲ	yes	yes	no	no	no	yes	yes	no	no	no	4.29046	2.05668
yes	male	15	normal	no	positive	negative	Ⅱ	yes	no	no	no	no	yes	no	no	no	no	6.00635	2.98921
yes	female	42	abnormal	no	positive	negative	Ⅳ	no	no	no	yes	no	yes	no	no	no	no	4.00733	2.03992
yes	female	19	abnormal	no	positive	positive	Ⅲ	yes	yes	no	no	yes	no	no	yes	no	no	4.89784	1.85473
yes	female	NA	abnormal	no	positive	positive	Ⅲ	no	yes	no	no	yes	yes	yes	yes	no	no	4.91998	1.7156
no	female	74	abnormal	no	positive	negative	Ⅳ	yes	yes	no	yes	no	yes	no	no	no	no	5.67332	1.72811
yes	male	10	normal	no	negative	negative	Ⅲ	yes	yes	no	no	no	yes	no	no	no	yes	5.55683	2.57718
yes	male	76	normal	no	positive	negative	Ⅱ	yes	no	no	no	no	yes	no	no	no	no	5.24702	2.74277
